# Supplementary material for: ABC transporter OsABCG18 controls the shootward transport of cytokinins and grain yield in rice
Source: PubMed Central journal article supplement — J Exp Bot. 2019 Aug 24;70(21):6277–91. doi: 10.1093/jxb/erz382 (PMC6859808; doi:10.1093/jxb/erz382), 2019-08-24
Supplement: erz382_suppl_supplementary_tables_s1_s4.pdf [file erz382_suppl_supplementary_tables_s1_s4.pdf]

**Table S1. Primers used in this study.**

| Primer name | Primer sequences (5'-3')                     | Engineered restriction site (with underline) | Purpose                      |
|-------------|----------------------------------------------|----------------------------------------------|------------------------------|
| OsABCG18-P1 | CGGA <u>AATTC</u> TATGCCGCCTCAGGAGTTGCATGGC  | <i>EcoR</i> I                                | For constructing             |
| OsABCG18-P2 | CGGGATCCTCACCTTGCTTGAGGCGGTCCAAGG            | <i>BamH</i> I                                | OsABCG18 expression          |
| OsABCG18-P3 | CATGAC <u>CCGGT</u> GTAAGTGCCTAAGGGAGTGCCTAG | <i>Age</i> I                                 | For cloning OsABCG18         |
| OsABCG18-P4 | CATG <u>CCATG</u> GGGCGATCGATCGATGGATGAAAATC | <i>Nco</i> I                                 | promoter                     |
| UBQ-F       | GCACAAGCACAAGAAGGTGA                         |                                              | The standard gene for        |
| UBQ-R       | CCAAAGAACAGGAGCCTACG                         |                                              | qRT-PCR                      |
| G18CAS 1F   | GGCAGTTCGAGGAGGTGGTGATACA                    |                                              | The first crispr/Cas9 target |
| G18CAS1R    | AAACTGTACACCACCTCCTCGAAC                     |                                              | site of g18                  |
| G18CAS2F    | GGCAGGCGCACCTGCAGGACCGGA                     |                                              | The second crispr/Cas9       |
| G18CAS2R    | AAACTCCGGTCCTGCAGGTGCGCC                     |                                              | target site of g18           |
| OsABCG18-P5 | GATCGTCTTCTCCTTCGCCAC                        |                                              | For amplifying the first     |
|             |                                              |                                              | crispr/Cas9 target with      |
|             |                                              |                                              | OsABCG18-P1                  |
| OsABCG18-P6 | GCAGTTCACGGTGCTGCTCCG                        |                                              | For amplifying the first     |
|             |                                              |                                              | crispr/Cas9 target with      |
|             |                                              |                                              | OsABCG18-P2                  |
| OsABCG18-P7 | CCACCGCGACTTCAGTTCTC                         |                                              | for OsABCG18 qRT-PCR         |
| OsABCG18-P8 | GGAGGTGTTGGTGGAAGAGGA                        |                                              |                              |
| OsRR2-F     | GACTACTGCATGCCGAGATG                         |                                              | for OsRR2 qRT-PCR            |
| OsRR2-R     | TTCTCCGACGACATGACCAC                         |                                              |                              |
| OsRR6-F     | ACCGACTACTGGATGCCCG                          |                                              | for OsRR6 qRT-PCR            |
| OsRR6-R     | TCCGACGACATGATCACCAC                         |                                              |                              |
| OsRR10-F    | CATGTCCTGGCTGTGGATGA                         |                                              | for OsRR10 qRT-PCR           |
| OsRR10-R    | TTGCTCCCGGAATCAACAGT                         |                                              |                              |

**Table S2. Accession codes used in this study.**

| <b>Gene</b>     | <b>Genes locus</b> | <b>Gene</b>     | <b>Genes locus</b> |
|-----------------|--------------------|-----------------|--------------------|
| <i>UBQ</i>      | LOC_Os01g45420     | <i>AtABCG1</i>  | AT2G39350          |
| <i>OsRR2</i>    | LOC_Os02g35180     | <i>AtABCG2</i>  | AT2G37360          |
| <i>OsRR6</i>    | LOC_Os04g57720     | <i>AtABCG3</i>  | AT2G28070          |
| <i>OsRR10</i>   | LOC_Os11g04720     | <i>AtABCG4</i>  | AT4G25750          |
| <i>OsABCG1</i>  | LOC_Os01g03144     | <i>AtABCG5</i>  | AT2G13610          |
| <i>OsABCG2</i>  | LOC_Os01g42900     | <i>AtABCG6</i>  | AT5G13580          |
| <i>OsABCG3</i>  | LOC_Os01g61940     | <i>AtABCG7</i>  | AT2G01320          |
| <i>OsABCG4</i>  | LOC_Os03g06139     | <i>AtABCG8</i>  | AT5G52860          |
| <i>OsABCG5</i>  | LOC_Os03g17350     | <i>AtABCG9</i>  | AT4G27420          |
| <i>OsABCG6</i>  | LOC_Os03g17370     | <i>AtABCG10</i> | AT1G53270          |
| <i>OsABCG7</i>  | LOC_Os03g64200     | <i>AtABCG11</i> | AT1G17840          |
| <i>OsABCG8</i>  | LOC_Os04g11820     | <i>AtABCG12</i> | AT1G51500          |
| <i>OsABCG9</i>  | LOC_Os04g44610     | <i>AtABCG13</i> | AT1G51460          |
| <i>OsABCG10</i> | LOC_Os05g02870     | <i>AtABCG14</i> | AT1G31770          |
| <i>OsABCG11</i> | LOC_Os05g02890     | <i>AtABCG15</i> | AT3G21090          |
| <i>OsABCG12</i> | LOC_Os05g13520     | <i>AtABCG16</i> | AT3G55090          |
| <i>OsABCG13</i> | LOC_Os05g31910     | <i>AtABCG17</i> | AT3G55100          |
| <i>OsABCG14</i> | LOC_Os06g30730     | <i>AtABCG18</i> | AT3G55110          |
| <i>OsABCG15</i> | LOC_Os06g40550     | <i>AtABCG19</i> | AT3G55130          |
| <i>OsABCG16</i> | LOC_Os06g51460     | <i>AtABCG20</i> | AT3G53510          |
| <i>OsABCG17</i> | LOC_Os07g18874     | <i>AtABCG21</i> | AT3G25620          |
| <i>OsABCG18</i> | LOC_Os08g07010     | <i>AtABCG22</i> | AT5G06530          |
| <i>OsABCG19</i> | LOC_Os09g03939     | <i>AtABCG23</i> | AT5G19410          |
| <i>OsABCG20</i> | LOC_Os09g07670     | <i>AtABCG24</i> | AT1G53390          |
| <i>OsABCG21</i> | LOC_Os09g23640     | <i>AtABCG25</i> | AT1G71960          |
| <i>OsABCG22</i> | LOC_Os09g29660     | <i>AtABCG26</i> | AT3G13220          |
| <i>OsABCG23</i> | LOC_Os09g29670     | <i>AtABCG27</i> | AT3G52310          |
| <i>OsABCG24</i> | LOC_Os10g08014     | <i>AtABCG28</i> | AT5G60740          |
| <i>OsABCG25</i> | LOC_Os10g30610     | <i>CBL1</i>     | AT4G17615          |
| <i>OsABCG26</i> | LOC_Os10g35180     |                 |                    |
| <i>OsABCG27</i> | LOC_Os11g07600     |                 |                    |
| <i>OsABCG28</i> | LOC_Os11g22350     |                 |                    |
| <i>OsABCG29</i> | LOC_Os12g22110     |                 |                    |
| <i>OsABCG30</i> | LOC_Os12g22284     |                 |                    |

**Table S3.**※ Agronomic traits of wild-type and *osabcg18* mutant plants at mature stage (for Figure 7).

| Agronomic Trait              | WT          | <i>osabcg18-14</i> | <i>osabcg18-32</i> | <i>osabcg18-24</i> |
|------------------------------|-------------|--------------------|--------------------|--------------------|
| Plant height (cm)            | 86.5 ± 2.1  | 76.5 ± 4.1 ***     | 74.8 ± 2.7 ***     | 77.7 ± 3.2 ***     |
| Effective tiller number      | 12.9 ± 2.2  | 7.4 ± 0.9 ***      | 6.9 ± 1.1 ***      | 7.6 ± 1.6 ***      |
| Days to flowering            | 79.7 ± 1.4  | 82.6 ± 1.2 ***     | 83.9 ± 1.2 ***     | 84.0 ± 1.4 ***     |
| Setting rate (%)             | 85.6 ± 2.3  | 69.2 ± 13.1 ***    | 69.3 ± 9.8 ***     | 75.6 ± 4.5 ***     |
| Panicle length (cm)          | 20.0 ± 0.7  | 18.1 ± 1.1 **      | 20.1 ± 0.8         | 17.9 ± 0.9 **      |
| Primary branches per panicle | 9.5 ± 0.5   | 7.6 ± 0.6 ***      | 8.7 ± 0.6 **       | 8.0 ± 0.6 ***      |
| Grain number per panicle     | 101 ± 11    | 73 ± 11 ***        | 66 ± 10 ***        | 74 ± 11 ***        |
| Grain length (mm)            | 7.06 ± 0.11 | 7.31 ± 0.18 ***    | 7.50 ± 0.03 ***    | 7.36 ± 0.10 ***    |
| Grain width (mm)             | 3.21 ± 0.14 | 3.32 ± 0.05 **     | 3.32 ± 0.04 **     | 3.33 ± 0.04 **     |
| 1000 grain weight (g)        | 23.4 ± 1.6  | 25.0 ± 1.50 **     | 27.0 ± 0.5 ***     | 24.7 ± 0.8 **      |
| Grain number per plant       | 773 ± 138   | 560 ± 257 ***      | 534 ± 134 ***      | 462 ± 144 ***      |
| Grain weight per plant (g)   | 17.5 ± 3.4  | 13.4 ± 6.5 ***     | 14.1 ± 3.4 ***     | 11.2 ± 3.5 ***     |

※ Values are means ± SD (n = 15). \*\* and \*\*\* indicate the significant differences at  $P < 0.01$  and  $P < 0.001$ , respectively (from *t*-test in one-way ANOVA).

**Table S4.** ※ Agronomic traits of wild-type (Zhonghua 11, ZH11) and *OsABCG18* overexpression plants (for Figure 8).

| Agronomic Trait              | ZH11        | G18OE-10       | G18OE-14        | G18OE-25       |
|------------------------------|-------------|----------------|-----------------|----------------|
| Plant height (cm)            | 102.1 ± 5.0 | 100.2 ± 5.2    | 99.9 ± 5.7      | 100.5 ± 5.5    |
| Effective tiller number      | 8.4 ± 1.7   | 10.6 ± 1.9 **  | 10.5 ± 1.6 **   | 10.0 ± 1.4*    |
| Setting rate (%)             | 86.3 ± 8.3  | 80.7 ± 10.6 ** | 84.2 ± 6.6      | 80.4 ± 7.2**   |
| Panicle length (cm)          | 21.4 ± 1.2  | 22.1 ± 1.3 *   | 23.1 ± 1.0 ***  | 21.0 ± 0.8     |
| Primary branches per panicle | 9.9 ± 1.5   | 10.0 ± 1.6     | 10.5 ± 1.0 *    | 10.4 ± 0.9     |
| Grain number per panicle     | 136 ± 26    | 145 ± 28 *     | 152 ± 17 **     | 142 ± 22       |
| Grain length (mm)            | 6.93 ± 0.07 | 7.21 ± 0.29 ** | 7.29 ± 0.06 *** | 7.37 ± 0.14*** |
| Grain width (mm)             | 3.09 ± 0.04 | 3.06 ± 0.04    | 3.02 ± 0.06 *** | 3.07 ± 0.04    |
| 1000 grain weight (g)        | 22.9 ± 0.5  | 23.7 ± 1.5 *   | 24.0 ± 0.9 ***  | 23.40 ± 0.6**  |
| Grain number per plant       | 840 ± 188   | 975 ± 205 *    | 978 ± 113 **    | 871 ± 137      |
| Grain weight per plant (g)   | 19.7 ± 3.3  | 23.1 ± 3.9 *   | 23.3 ± 2.5 **   | 20.3 ± 2.4     |

※ Data are means ± SD (n ≥ 12). \*, \*\* and \*\*\* indicate significant differences at  $P < 0.05$ ,  $P < 0.01$  and  $P < 0.001$ , respectively (from *t*-test in one-way ANOVA).
